# Supplementary material for: Fat body-specific reduction of CTPS alleviates HFD-induced obesity
Source: eLife. 2023 Sep 11;12:e85293. doi: 10.7554/eLife.85293 (PMC10495109; doi:10.7554/eLife.85293)
Supplement: Figure 5—figure supplement 1—source data 1. [file elife-85293-fig5-figsupp1-data1.xls]

## Sheet: FigureS6A-source data
gene_id	baseMean_control_Con	baseMean_case_CTPs
128up	3449.75	2781.81
14-3-3epsilon	17369.2	15254.4
14-3-3zeta	24270.6	21160.9
140up	656.721	682.141
18w	521.439	405.375
26-29-p	6305.97	4836.08
2mit	95.6187	60.3388
312	324.356	270.149
4E-T	1761.26	1714.33
5-HT1A	56.2513	41.847
5-HT2A	13.36	16.8594
5-HT2B	15.8118	8.27303
5-HT7	54.3208	55.188
5PtaseI	189.764	192.151
7B2	177.172	187.99
825-Oak	7.9654	29.5277
A16	445.364	405.118
AANATL2	520.698	1550.34
ABCB7	2730.98	2777.74
ACC	143404	70559
ACXD	156.413	148.315
ADD1	428.367	474.626
ADPS	22.9649	16.5145
AGBE	6720.52	2957.68
AGO1	2609.06	2341.68
AGO2	2446.18	3071.13
AGO3	274.214	326.865
AIF	4313.92	3644.02
AIMP2	2445.85	2236.02
AIMP3	912.102	897.681
ALiX	2027.13	2048.68
AMPKalpha	1857.93	1644.94
AMPdeam	1464.87	1695.16
AOX1	5153.3	12661.4
AOX2	3.77379	6.80156
AOX3	1229.12	1114.29
AP-1-2beta	1774.29	1770.05
AP-1gamma	1653.66	1657.32
AP-1mu	1057.92	913.04
AP-1sigma	1341.93	1324.32
AP-2alpha	1899.09	1787.65
AP-2mu	1407.17	1190.62
AP-2sigma	791.648	743.462
APC10	216.027	192.358
APC4	244.084	262.768
APC7	1.04032	16.4272
APP-BP1	633.178	651.192
AQP	6.66987	7.71517
ASPP	131.47	146.335
ATP7	1304.23	1350.51
ATP8B	682.752	697.197
ATPCL	82700.9	33064.9
ATPsynB	18121.8	14848.2
ATPsynC	110409	104126
ATPsynCF6	10787.7	9741.05
ATPsynD	12823	11114.7
ATPsynE	8372.9	8057.22
ATPsynF	14185	12848.7
ATPsynG	13553	11061.2
ATPsynO	14834.8	12732.1
ATPsynbeta	102049	87620.9
ATPsynbetaL	12.9694	10.2359
ATPsyndelta	12999.9	11320.2
ATPsynepsilonL	402.888	481.102
ATPsyngamma	22692.5	18107.9
ATbp	68.2706	65.8491
Aac11	2151.65	2111.77
Aatf	1020.12	1095.35
Abd-B	377.348	432.749
Abi	767.681	745.452
Abl	468.613	484.637
Abp1	496.911	497.696
Ac13E	752.489	678.677
Ac3	135.722	112.621
Ac76E	638.704	616.573
Ac78C	438.846	355.102
AcCoAS	54613.8	23069.7
Ace	348.39	337.243
Acer	5452.59	4281.13
Acf	1109.27	778.379
Ack	950.325	926.892
Ack-like	866.792	989.084
Acn	2173.02	2095.38
Acon	30044.6	25881.3
Acox57D-d	1632.81	1149.1
Acox57D-p	993.688	885.04
Acp24A4	4.48808	15.1086
Acph-1	558.939	555.427
Acsl	32535.3	20476.5
Act42A	2130.38	2299.93
Act57B	13305.9	16367.9
Act5C	30743.7	33029.8
Act79B	11	20.4814
Act87E	372.596	451.972
Actbeta	56.6801	43.6915
Actn	1546.96	1519.61
Actn3	2.82529	3.81775
Acyp2	206.07	229.537
AdSL	2368.99	2087.13
AdSS	10655.3	9418.46
Ada	157.872	200.814
Ada1-1	3.5497	4.9883
Ada1-2	76.2165	72.8119
Ada2a	111.944	142.445
Ada2b	394.229	534.872
Ada3	264.389	252.343
AdamTS-A	2165.69	1702.34
Adar	275.348	281.437
Adat1	156.272	199.075
Adck	1065.23	990.541
AdenoK	7683.59	5842.88
Adf1	577.823	567.351
Adgf-A	4454.42	4613.51
Adgf-A2	5.94081	7.37822
Adgf-C	35.4698	33.4571
Adgf-D	131.734	174.364
AdipoR	4659.37	3960.4
Adk1	238.757	329.874
Adk2	15344.8	10887.4
Adk3	10974.1	7799.1
AdoR	36.5257	68.8483
Aduk	193.428	189.171
Ady43A	1321.73	746.367
Aef1	1892.35	1636.6
Afti	395.389	374.518
Ag5r	2737.14	3672.5
Ag5r2	92.4635	171.444
Ahcy	21797.6	14013.2
AhcyL1	608.272	605.918
AhcyL2	1354.41	1258.27
Ak6	580.112	564.195
Akap200	3612.78	3222.33
Akh	47.7491	19.5615
AkhR	2160.44	1979.14
Akt1	1936.93	1841.68
AlaRS	5039.87	5516.25
AlaRS-m	1603.83	1652.51
Alas	2044.64	1504.41
Ald	45730.3	35593.1
Aldh	38569.4	46182.6
Aldh-III	3390.35	4039.82
Alg-2	769.114	927.308
Alg10	380.787	355.808
Alh	505.832	511.807
Alk	134.858	124.216
AlkB	154.681	224.969
Alp1	436.839	412.986
Alp4	5071.16	4451.89
Alr	608.424	906.33
Als2	756.593	809.426
Ama	66.9875	80.4211
Amnionless	331.477	337.642
Amph	1745.05	1878.18
Amun	2859.23	2662.15
Amy-d	5.37511	15.0846
Amy-p	1.0302	32.3158
Amyrel	2.7537	4.20312
Ance	4473.64	4398.16
Ance-2	2.79961	7.07327
Ance-4	6748.9	4586.3
Ance-5	1865.68	2378.86
Ank	3422.53	3125.79
Ank2	500.168	428.508
Ankle2	567.227	699.646
Ant2	801.415	835.731
Antp	436.874	325.1
AnxB10	100.833	148.765
AnxB11	3050.76	5144.07
AnxB9	3348.42	3712.56
Aos1	1366	1149.87
Apc	1356.62	1320.94
Apc2	104.483	140.964
ApepP	1508.83	1393.15
Aplip1	49.8515	43.5058
Apoltp	83050	72938.6
Appl	410.395	365.761
Aprt	895.148	1458.51
Aps	2761.21	2964.28
Arc1	1300.66	6136.23
Arc2	91.2962	1782.69
Arc42	2135.94	2034.71
Archease	667.796	1242.34
Arf102F	3571.59	3274.33
Arf51F	1767.96	1934.83
Arf79F	16126.2	14333.7
ArfGAP1	2684.07	2139.48
ArfGAP3	3872.37	2759.01
Arfip	314.572	311.671
Arfrp1	231.848	217.176
ArgRS	3291.8	2776.25
ArgRS-m	469.296	490.571
Argk	7272.37	7920.06
Arl1	1488.96	1278.1
Arl2	216.276	223.241
Arl4	693.482	743.425
Arl5	670.014	619.878
Arl6	4.56434	6.48136
Arl6IP1	437.775	402.528
Arp1	1664.95	1525.35
Arp10	399.189	403.21
Arp2	1242.65	1275.57
Arp3	1582.4	1559.86
Arp5	287.277	238.207
Arp6	439.135	445.956
Arp8	252.373	274.087
Arpc1	2694.25	2612.38
Arpc2	2339.96	2304.28
Arpc3A	553.381	601.471
Arpc3B	132.645	182.707
Arpc4	561.063	557.392
Arpc5	611.957	584.539
Ars2	3473.82	2984.9
Art1	3404.54	3239.84
Art3	2527.12	1855.13
Art4	1060.83	788.396
Art7	493.983	429.217
Art8	788.052	792.847
Arv1	173.423	156.635
Asap	747.597	762.94
Asator	351.738	422.555
Asciz	90.9305	99.6803
Ask1	1037.05	1057.45
AsnRS	5624.76	4849.88
AsnRS-m	334.331	324.292
AsnS	6407.5	5341.5
AspRS	7266.36	5229.54
AspRS-m	2692.98	2252.83
Asph	1149.83	992.458
AstA	48.8983	36.0763
AstA-R1	8.75052	7.69917
AstA-R2	48.9746	37.4997
AstC	30.7164	31.0448
AstC-R2	39.6015	60.7636
AstCC	4.73164	5.69264
Asx	700.29	667.527
Atac1	157.268	128.318
Atac2	311.253	301.342
Atac3	215.51	261.953
Atet	1240.5	1209.67
Atf-2	159.183	154.301
Atf3	805.221	736.309
Atf6	1178.86	1103.24
Atg1	648.348	704.883
Atg10	61.0872	52.9356
Atg101	384.087	411.942
Atg12	115.938	130.923
Atg13	472.503	499.124
Atg14	522.141	475.978
Atg16	520.635	509.411
Atg17	900.23	977.922
Atg18a	935.627	980.303
Atg18b	159.826	228.599
Atg2	1348.87	1107.11
Atg3	570.93	593.645
Atg4a	710.052	719.251
Atg4b	690.938	779.641
Atg5	331.793	312.377
Atg6	323.489	298.683
Atg7	228.021	260.168
Atg8a	1581.53	2030.57
Atg9	448.251	450.84
Atox1	1292.64	1334.99
Atpalpha	12423.2	14044.4
AttA	593.663	568.671
AttB	1450.65	1006.88
AttC	440.708	344.027
AttD	10.1441	9.30752
Atu	986.673	902.896
Atx-1	13.6113	11.0823
Atx2	1390.36	1272.78
Atxn7	339.378	316.084
Aven	185.362	176.007
Awh	19.7567	31.4072
Axn	1033.68	968.784
Axs	267.333	308.634
Axud1	563.499	504.828
B-H1	2.00906	3.04741
B-H2	2.01917	1.86046
B4	330.002	368.828
B52	10763.4	8264.62
B9d1	8.04245	1.87687
BBS1	104.804	198.327
BBS4	2.672	1.89287
BBS8	2.43779	1.84445
BCAS2	531.593	458.945
BCL7-like	462.772	411.46
BEAF-32	601.753	578.103
BG642312	15.3955	20.6331
BHD	145.816	132.206
BI-1	2908.55	4054.48
BOD1	741.324	625.073
BRWD3	1467.35	1573.6
BTBD9	299.568	316.083
Bacc	7674.17	5425.91
Bace	60.7995	44.0476
Baldspot	16725.3	10613.5
Bap111	773.618	679.796
Bap170	940.681	852.796
Bap55	1262.93	1151.35
Bap60	1067.85	1021.35
Bdbt	499.739	468.858
Bdp1	845.078	799.659
Bem46	442.859	392.386
Best1	915.428	908.313
Best2	288.185	299.597
Bet1	920.386	898.339
Bet3	295.509	256.829
Bet5	560.718	508.004
Bgb	164.131	151.568
BicD	1101.6	1191.11
BigH1	11.3766	17.9959
Bili	35.1632	23.2208
Bin1	672.778	3957.27
Bka	474.282	481.391
Blimp-1	58.6627	52.2409
Blm	300.819	375.804
Blos1	198.065	231.113
Blos2	214.126	205.119
Blos3	154.667	137.255
Blos4	82.2827	104.695
Bmcp	702.394	814.704
BoYb	60.9214	58.3512
Br140	567.057	508.41
Brca2	229.355	228.866
Brd	5.71594	3.30353
Brd8	372.028	320.86
Bre1	799.822	702.057
Brf	684.286	702.74
Brms1	472.74	470.877
Bruce	5235.95	5123.38
Bsg	9989.24	9722.06
Bsg25D	423.861	417.605
BtbVII	1230.89	1103.86
BthD	94.7945	111.868
Btk29A	366.718	491.002
Btnd	556.935	696.928
BuGZ	1856.45	1605.17
Bub1	469.111	483.292
Bub3	1000.03	982.559
BubR1	234.012	309.343
Buffy	26.6951	43.4184
Bug22	401.703	406.787
Burs	5.33387	8.36748
Bx	99.8709	94.4488
Bx42	1169.44	1133.23
C15	5.06311	3.75094
C1GalTA	174.197	166.733
C3G	852.734	838.875
CAH1	1536.51	1885.48
CAH2	243.455	540.01
CAHbeta	701.217	788.672
CAP	3864	3659.8
CASK	873.898	788.937
CBP	420.606	544.116
CCAP	8.81591	4.1043
CCAP-R	6.13923	6.78433
CCDC53	37.2415	48.3819
CCHa1	6.15403	3.031
CCHa1-R	15.587	12.2057
CCHa2	5741.11	2773.28
CCHa2-R	19.4985	13.8852
CCKLR-17D1	8.75988	2.1494
CCKLR-17D3	9.83055	7.37542
CCT1	6824.25	6084.8
CCT2	7819.2	6096.86
CCT3	6968.09	5769.46
CCT4	7943.34	6387.82
CCT5	9455.15	7974.32
CCT6	6119.61	5325.39
CCT7	6515.7	5429.26
CCT8	6778.15	5480.57
CD98hc	9377.45	6962.47
CDC45L	781.835	832.647
CDK2AP1	359.446	352.289
CDase	143.053	193.753
CG10000	1.35623	6.62586
CG10005	22.5066	35.5704
CG10011	248.668	264.739
CG10013	112.614	99.8957
CG10019	57.1383	57.6422
CG10026	308.567	458.974
CG10031	770.764	1281.93
CG10038	493.638	535.36
CG10041	5.21173	6.68947
CG10050	425.982	349.539
CG10051	62.6452	34.069
CG10053	128.458	149.301
CG10055	809.619	822.094
CG10062	174.917	240.818
CG10063	165.557	305.19
CG10064	1.36635	4.58651
CG10068	647.537	674.025
CG10073	350.033	491.149
CG10075	807.965	787.035
CG10077	5582.58	4772.64
CG10081	26.9855	64.5158
CG10082	989.172	961.227
CG10086	433.294	429.7
CG10089	31.1964	47.8306
CG10098	191.251	186.57
CG10103	715.8	688.759
CG10116	18.4714	5.98117
CG10126	109.654	127.196
CG10131	6380.32	4287.76
CG10132	104.628	93.5386
CG10133	367.921	372.279
CG10137	77.4211	122.293
CG10139	173.243	179.255
CG10140	35.5921	301.641
CG10147	78.1347	65.8587
CG10151	122.944	154.163
CG10154	204.611	1428.36
CG10165	1012.06	805.69
CG10166	1101.43	1201.27
CG10168	13.1865	24.4461
CG10170	96.3344	135.656
CG10171	491.429	502.763
CG10175	32.0951	85.7994
CG10178	200.948	224.198
CG10182	24.5944	172.616
CG10184	6451.06	5403.46
CG10188	237.794	194.344
CG10189	335.443	494.78
CG10194	567.941	602.371
CG10205	4.16597	7.58749
CG10208	271.693	439.509
CG10209	211.484	216.148
CG10211	82.5339	266.799
CG10214	990.488	884.125
CG10217	400.045	417.887
CG10222	105.651	91.0655
CG10226	70.391	48.8918
CG10232	505.925	1267.68
CG10237	29.2325	21.9093
CG10254	1685.31	2399.31
CG10257	1.71338	1.5075
CG10265	89.4357	113.389
CG10268	158.73	197.558
CG10274	225.049	256.365
CG10283	79.7795	92.8628
CG10286	2336.34	2081.66
CG10289	1885.69	1710.02
CG10300	5.77665	20.2141
CG10301	1.40758	3.01459
CG10307	12.8815	9.15982
CG10311	486.782	583.798
CG10321	938.477	775.303
CG10324	153.531	159.125
CG10333	821.982	836.73
CG10336	233.539	227.11
CG10337	784.392	934.925
CG10338	597.536	518.706
CG10339	1.04032	2.05215
CG10340	2544.93	2017.71
CG10341	953.942	903.337
CG10343	816.695	719.374
CG10344	143.155	131.315
CG10345	9.95893	12.5262
CG10347	830.334	758.79
CG10348	50.824	74.7541
CG10352	4.13093	2.21382
CG10353	1498.12	1587.46
CG10359	204.433	251.6
CG10361	45.8675	44.9685
CG10362	22.2312	14.0441
CG10365	860.366	901.353
CG10366	239.263	261.041
CG10375	526.052	463.767
CG10376	516.731	524.228
CG10383	372.989	454.729
CG10384	33.1837	23.8575
CG10395	239.522	195.93
CG10399	407.526	410.76
CG10405	47.4916	356.947
CG10407	61.3144	55.2775
CG10413	1123.55	1024.86
CG10417	2132.38	2308.86
CG10418	291.039	275.676
CG10420	952.235	1017.87
CG10424	817.106	817.431
CG10425	515.489	455.01
CG10428	597.088	519.455
CG10431	41.3934	41.6092
CG10433	3180.4	2342.18
CG10435	416.236	374.612
CG10444	2463.13	2174.99
CG10445	107.066	297.968
CG10462	746.575	803.044
CG10463	808.519	884.955
CG10465	968.011	977.365
CG10466	99.1223	109.35
CG10467	818.942	582.336
CG10469	74.6215	53.3561
CG10470	1844.48	1402.42
CG10472	30.4394	43.0804
CG10474	22.1727	7.85804
CG10479	16.6382	11.5977
CG10483	27.5152	25.5162
CG10492	655.164	575.792
CG10494	62.9165	51.713
CG10495	166.139	163.053
CG10505	109.704	142.404
CG10508	44.5137	45.3803
CG10512	5410.26	4419.67
CG10513	2821.12	2940.88
CG10514	5734.13	5867.03
CG10516	245.349	405.899
CG10527	2849.52	2958.78
CG10543	980.231	856.988
CG10550	409.631	455.643
CG10553	256.19	308.852
CG10555	678.149	615.712
CG10559	31.4587	42.2223
CG10560	1600.53	1877.22
CG10561	171.892	168.989
CG10562	59.573	97.5587
CG10565	6156.84	4683.07
CG10576	20620.2	16284.7
CG10581	12.4691	71.8107
CG10584	184.451	238.851
CG10585	619.852	565.709
CG10591	1.07611	9.45958
CG10592	21.138	114.871
CG10598	246.278	482.109
CG10600	772.295	807.895
CG10602	3917.52	3475.31
CG10616	721.203	638.827
CG10621	2358.99	4006.84
CG10623	429.056	638.987
CG10628	647.333	686.927
CG10631	1031.77	1067.2
CG10638	1569.86	4438.52
CG10646	173.944	158.742
CG10650	586.62	787.091
CG10654	63.5382	84.6795
CG10657	27.9035	104.316
CG10659	3.75747	40.2971
CG10660	247.046	373.737
CG10663	35.616	38.6002
CG10669	143.668	148.558
CG10672	1360.52	1518.56
CG10674	1069.7	1022.49
CG10681	107.602	88.181
CG10702	67.9749	102.501
CG10710	24.3484	28.2259
CG10713	8.53035	6.59065
CG10721	183.903	215.155
CG10725	593.339	4497.53
CG10730	12.5547	7.2013
CG10731	185.393	156.022
CG10737	871.002	1298.52
CG10738	212.107	321.589
CG1074	569.078	513.192
CG10747	113.341	114.742
CG10764	15.7534	11.7242
CG1077	19.2565	24.711
CG10778	1203.26	1146.39
CG10795	139.009	145.328
CG10799	146.569	765.142
CG10801	3.44232	2.77488
CG10802	824.797	1094.83
CG10803	483.826	497.749
CG10804	32.1123	19.7368
CG10809	282.546	280.05
CG10814	3903.26	5054.06
CG10827	36.679	39.6036
CG10862	12.8776	18.6734
CG10863	15053	10610.8
CG10864	17.9344	19.2961
CG10866	112.228	113.84
CG10869	2.44247	2.08457
CG10874	321.988	337.536
CG10877	1090.11	1439.55
CG10880	270.827	275.694
CG10887	9.00107	14.7904
CG10889	126.998	111.838
CG10898	186.11	180.66
CG1090	61.274	66.7833
CG10903	990.316	1045.84
CG10904	180.177	158.976
CG10907	314.477	281.463
CG10910	2118.87	4205.07
CG10911	379.666	492.964
CG10912	66.9878	476.895
CG10914	546.003	502.746
CG10915	466.643	425.606
CG10916	471.479	664.233
CG10918	1011.59	395.407
CG1092	273.798	710.44
CG10924	317.72	404.605
CG10927	147.541	168.135
CG10932	5599.66	4539.64
CG10936	350.114	1776.04
CG10939	381.16	539.59
CG10943	48.8222	82.2054
CG10947	225.951	206.923
CG10948	627.941	583.827
CG10949	113.732	113.692
CG10953	376.764	1363.37
CG10958	76.6733	59.3853
CG10959	37.9348	44.3832
CG10960	3061.97	2242.62
CG10962	14250.2	12190.6
CG10970	2.16779	1.76362
CG10973	748.939	739.633
CG10979	285.693	333.779
CG10984	451.965	394.226
CG11000	96.9422	74.499
CG11007	615.645	596.271
CG11029	9.01119	17.4813
CG1103	355.217	308.128
CG11030	1032.92	1019.21
CG11034	223.921	551.271
CG11035	246.754	279.901
CG11044	2.7537	3.16026
CG1105	1339.25	1105.28
CG11050	1819.18	1499.59
CG11052	1.75929	3.09543
CG11069	39.0615	43.7618
CG11070	967.213	1010.44
CG11073	50.1003	77.0984
CG11076	4552.67	4312.83
CG11077	370.553	391.916
CG11089	3350.33	3414.73
CG11095	185.987	181.5
CG11103	170.497	167.239
CG11109	629.41	473.526
CG11110	307.533	343.943
CG11122	706.573	575.69
CG11123	882.069	913.051
CG11125	36.7272	48.6489
CG11127	487.858	398.294
CG1113	1.39203	1.25097
CG11131	292.92	793.435
CG11134	2379.41	2652.74
CG11137	1526.12	1298.26
CG11138	806.289	832.551
CG11141	130.653	142.437
CG11147	29.4823	70.8692
CG11149	8.90697	11.3561
CG11151	2350.8	2449.21
CG11158	2021.4	1509.51
CG1116	279.451	279.793
CG11162	46.5826	338.366
CG11164	130.474	170.296
CG11168	354.483	352.003
CG11170	98.4026	66.5718
CG11178	293.396	295.554
CG11180	1443.44	1371.65
CG11191	20.2338	7.90646
CG11192	4.90593	26.547
CG11200	789.758	1043.51
CG11208	2285.59	2151.79
CG11210	535.609	594.616
CG11221	27.3565	29.2039
CG11226	3.51858	3.4492
CG11236	163.253	283.831
CG1124	57.6316	67.3071
CG11241	1587.38	1093.3
CG11247	375.404	437.086
CG11248	295.421	327.94
CG11257	111.408	106.613
CG1126	1.36167	2.3891
CG11261	175.078	192.29
CG11263	20.0221	17.6105
CG11267	18232.1	14606.3
CG11275	109.54	215.368
CG11279	799.178	803.883
CG11284	3041.06	2815.48
CG1129	1134.68	1452.43
CG11300	62135.5	67819.1
CG11306	1630.89	1637.49
CG11307	217.774	253.047
CG11309	1922.56	2389.31
CG11313	85.2402	753.787
CG11317	43.6173	35.2107
CG11318	17.0093	29.9579
CG11319	90.3362	78.1282
CG11327	67.2599	94.6245
CG11333	11.4186	6.03157
CG11334	5433.76	4785.35
CG11342	173.928	199.145
CG11345	25.0276	106.433
CG11350	685.519	834.772
CG11353	15.9464	63.1509
CG11357	1374.53	1163.78
CG1136	6.13923	18.4581
CG11360	718.236	774.458
CG11367	142.914	182.026
CG11368	6.76094	9.1306
CG11370	2261.86	7499.18
CG11374	6.92978	4.58692
CG11377	1843.95	1858.03
CG11378	280.882	533.383
CG11380	4.67093	5.51456
CG11382	16.3277	29.841
CG11384	38.7868	83.5731
CG11388	162.226	144.334
CG1139	97.17	93.5526
CG11396	370.889	368.498
CG11398	80.458	84.7041
CG11399	500.01	409.204
CG11400	253.256	211.885
CG11403	83.277	94.3335
CG11407	5.69102	16.5192
CG11409	17.0217	27.0217
CG11413	258.978	285.173
CG11414	2088.22	1677.35
CG11417	1237.91	1133.2
CG1142	790.601	817.211
CG11425	5235.8	3593.54
CG11426	247.611	215.946
CG1143	354.562	663.75
CG11436	152.28	164.313
CG11437	11.4677	10.1827
CG11438	33.9462	44.8859
CG11444	4919.97	5058.97
CG11447	263.613	222.632
CG11448	504.789	447.602
CG11453	128.416	234.857
CG11454	294.632	341.198
CG11456	196.23	189.678
CG1146	157.523	153.933
CG11474	893.337	982.634
CG11475	8.63381	9.8009
CG11486	1378.15	1663.18
CG11498	2.06041	4.92387
CG11504	262.751	260.135
CG11505	3132.77	3147.07
CG11523	537.31	496.597
CG11529	1122.74	689.206
CG11534	180.434	199.543
CG11537	2574.15	2670.81
CG11539	103.399	100.914
CG11550	2.79493	3.76933
CG11555	1013.09	891.796
CG11560	130.04	152.276
CG11562	585.77	568.334
CG11563	1355.24	1423.18
CG11570	15.4819	8.38907
CG11576	484.852	581.781
CG11581	41.6665	62.6535
CG11583	2016.77	2022.87
CG11584	25.8773	26.195
CG11585	26.9409	16.7813
CG11586	241.106	245.023
CG11590	229.758	234.111
CG11593	250.464	269.232
CG11594	11099.8	6942.57
CG11596	1908.21	1688.31
CG11597	44.0491	29.5956
CG11598	1.36635	8.90172
CG11601	496.989	596.199
CG1161	1303.1	1022.15
CG11617	10.5915	15.7829
CG11619	215.181	82.2762
CG11626	2.37632	3.04701
CG11638	71.4663	70.567
CG11652	670.921	682.494
CG11655	144.891	258.927
CG11658	39.1385	83.2917
CG11659	363.914	407.862
CG11665	872.154	987.596
CG11668	15.2173	16.7641
CG11670	8.51555	5.74106
CG11671	11.7587	23.079
CG11672	112.383	663.677
CG11674	1.76473	3.20827
CG11679	873.108	837.668
CG11686	651.346	658.078
CG11695	135.62	128.899
CG11696	225.242	194.208
CG11699	978.691	775.576
CG11700	12.2037	13.6331
CG11710	541.613	1041.03
CG1172	559.557	568.871
CG11722	629.947	558.723
CG11723	349.616	297.792
CG11737	841.757	1248.41
CG11741	11.5307	15.995
CG11752	1929.44	1789.3
CG11753	258.826	261.825
CG11755	122.812	127.588
CG11760	2.41211	3.75333
CG11771	3086.4	2577.97
CG11777	289.231	267.849
CG11779	4057.19	2983.32
CG11781	709.177	632.996
CG11788	136.025	144.842
CG11790	1178.19	925.054
CG11791	1029.28	1102.54
CG11796	117.411	179.034
CG11802	150.738	146.579
CG11807	533.146	575.572
CG11808	159.925	143.986
CG11811	1277.81	1494.89
CG11825	41.1546	76.7058
CG11835	10.0048	7.73117
CG11836	74.97	130.299
CG11837	809.599	859.811
CG11842	7.32272	12.2552
CG11843	2.33041	3.19226
CG11851	990.51	881.519
CG11852	126.424	620.828
CG11857	4352.17	3611.42
CG11858	871.62	839.979
CG11873	909.988	806.168
CG11876	31256	17975.3
CG11878	32.0142	20.7412
CG11882	130.736	105.941
CG11883	607.786	516.993
CG11885	524.88	458.03
CG11892	4926.88	5517.93
CG11893	214.928	554.585
CG11897	633.704	1626.57
CG11898	2.03941	19.1653
CG11899	4088.15	4513.26
CG11902	210.633	210.651
CG11905	181.748	233.913
CG11906	229.113	229.481
CG11911	37.6088	30.6514
CG11920	837.177	915.467
CG11927	206.408	186.206
CG11929	97.0938	122.121
CG11951	2228.6	1545.04
CG11961	1081.87	1870.1
CG11964	846.129	824.388
CG11966	9.89126	6.12643
CG11970	659.524	636.818
CG11975	341.71	374.924
CG11980	3714.43	2880.64
CG11982	756.043	643.477
CG11983	17.9749	18.5874
CG11986	211.094	215.129
CG11999	1721.22	1539.85
CG12004	990.74	1133
CG12007	528.967	532.637
CG12009	140.231	124.464
CG12010	224.141	236.008
CG12012	212.688	303.104
CG12017	2.39112	11.703
CG12018	232.904	297.791
CG12024	438.97	392.873
CG12025	744.735	766.04
CG12034	780.195	674.452
CG12038	19.7179	18.8095
CG12054	1240.52	1237.16
CG12056	226.957	276.535
CG12057	54.6339	20.4015
CG12065	389.441	441.515
CG12071	60.5099	49.9616
CG12075	80.5763	126.345
CG1208	44.9993	93.2533
CG12081	326.21	390.797
CG12084	1114.33	2069.32
CG12091	2227.86	1982.91
CG12093	592.111	451.977
CG12096	664.121	640.054
CG12099	3377.57	3081.88
CG12104	298.171	338.492
CG12105	20.9333	30.5065
CG12106	97.7046	97.386
CG12107	2534.91	1874.31
CG12111	10.8366	8.87047
CG12112	228.938	327.421
CG12115	85.3992	194.211
CG12116	21512.6	16834.6
CG12118	366.472	332.234
CG12121	2016.22	2061.57
CG12123	177.39	190.73
CG12128	1063.42	957.747
CG12129	723.239	478.616
CG1213	1029.2	1590.08
CG12134	930.214	1113.81
CG12155	312.733	287.731
CG12159	752.192	741.195
CG12163	1554.39	1633.82
CG12164	2.98323	5.51456
CG12170	1222.78	1186.11
CG12171	3607.56	6476.24
CG12173	1656.85	1269.46
CG12177	433.446	856.396
CG12179	147.683	180.283
CG1218	229.207	246.509
CG12182	213.221	171.527
CG12184	3.40652	5.46853
CG12194	28.4738	31.5262
CG12200	2.84084	5.75945
CG12204	115.11	142.322
CG12206	19.9178	32.1377
CG12213	760.91	669.251
CG12219	184.073	161.082
CG12224	26.734	144.973
CG12229	4.22275	6.14243
CG12236	159.06	168.518
CG12237	334.97	400.44
CG12239	128.428	98.1724
CG12241	706.697	764.562
CG12253	42.8018	48.8237
CG12259	302.764	254.158
CG12262	2387.22	2762.91
CG12264	1967.79	4126.74
CG12267	464.705	518.547
CG12268	18.7343	152.297
CG1227	618.065	573.702
CG12279	443.488	527.846
CG12288	1567.48	1550.61
CG12290	338.68	457.502
CG12299	272.118	271.213
CG12301	1275.9	1338.02
CG1231	2.05497	2.1494
CG12310	37560.9	33576.5
CG12316	291.328	359.914
CG12320	178.951	130.558
CG12321	628.01	706.467
CG12325	1586.43	1667.17
CG1233	675.713	704.622
CG12333	200.659	199.946
CG12338	633.696	722.958
CG1234	1651.74	1489.29
CG12341	267.422	308.076
CG12343	283.645	311.976
CG12344	7.89384	9.39795
CG12355	123.254	155.692
CG1236	1593.92	1809.67
CG12374	2.41211	2.58278
CG12375	1101.69	977.171
CG12379	139.373	149.842
CG12384	1067.55	1210.97
CG12391	477.553	477.098
CG12393	381.492	382.327
CG12402	58.9233	49.681
CG12404	1564.02	1594.18
CG12428	218.701	898.518
CG1246	267.86	464.458
CG12477	854.408	848.169
CG12480	403.619	493.764
CG12484	78.4732	54.438
CG12490	2.09076	2.8233
CG12491	90.8938	67.1141
CG12493	160.129	167.522
CG12499	1889.42	1821.74
CG12502	28.4676	29.1383
CG12506	300.236	420.711
CG12511	2.10632	6.2565
CG12512	2912.17	2113.55
CG12519	7.71563	137.734
CG12520	1.37179	6.09401
CG12522	3249.61	1732.92
CG12531	111.089	93.6042
CG12535	86.1109	194.002
CG12541	17.0163	17.2072
CG12547	822.279	730.424
CG12560	415.673	482.804
CG12567	876.344	900.557
CG12576	687.925	912.312
CG12581	463.485	805.935
CG12590	37.5698	45.0076
CG12592	12.6613	7.20252
CG12594	48.2665	31.5434
CG12605	97.5584	78.0081
CG12607	92.6555	229.825
CG12608	1851.19	1610.38
CG12643	554.575	290.437
CG1265	2030.7	1801.29
CG12655	10.9175	22.7437
CG12659	144.518	158.329
CG12688	3.47811	2.90414
CG12702	91.9569	106.722
CG12708	7.36317	5.83551
CG1271	424.103	382.374
CG12713	137.396	170.875
CG12717	338.625	304.459
CG12721	7.25658	40.0708
CG12728	227.447	256.758
CG1273	39.5759	37.5284
CG12730	173.928	262.522
CG12744	155.739	272.914
CG12746	891.678	941.817
CG1275	1029.17	1075.55
CG12766	118.646	1409.08
CG12768	49.9993	49.2812
CG12769	4.77288	10.4544
CG12772	147.705	174.007
CG12773	1920.13	1676.91
CG12782	81.8103	92.836
CG12795	310.935	308.7
CG12811	4152.57	2662.93
CG12814	83.7883	169.389
CG12817	5.10359	6.44499
CG12818	177.728	176.546
CG12822	300.861	302.021
CG12824	16.8381	27.4775
CG12825	713.633	1640.22
CG12826	52.2908	198.967
CG12836	7.48067	4.9727
CG12848	1566.67	1216.02
CG12851	33.9346	49.6025
CG12863	125.22	117.586
CG12868	100.942	227.745
CG12869	3.71232	3.54324
CG12877	233.47	263.611
CG12880	78.8372	63.0765
CG12883	204.42	222.522
CG12895	480.322	438.307
CG12896	178.402	160.048
CG12909	1205.1	1212.78
CG1291	974.904	795.683
CG12910	83.1005	80.2555
CG12911	11.7991	15.2558
CG12913	14.9862	9.50841
CG12917	1.066	1.34781
CG12920	5.70114	12.5582
CG12923	6.27304	18.0791
CG12926	81.651	243.956
CG12929	121.151	124.704
CG12934	985.814	7177.99
CG12935	1004.71	936.771
CG12942	164.449	161.291
CG12945	432.175	425.666
CG12947	85.9942	69.506
CG12948	171.518	200.452
CG12950	83.2927	59.8898
CG12963	319.945	363.15
CG12964	7.7709	19.367
CG12970	2.0962	5.08554
CG12971	5.12458	7.26456
CG12974	261.186	355.263
CG12975	738.932	781.749
CG12984	10.0468	12.3009
CG12985	1.336	1.15414
CG1299	25.3941	101.231
CG12991	106.378	129.18
CG12992	72.2895	92.2317
CG12994	3.36061	3.54324
CG13001	107.738	93.5331
CG13003	1.38191	5.03474
CG13004	1.10179	1.81204
CG13005	66.7852	57.8426
CG13012	32.7021	48.5255
CG13014	562.747	609.205
CG13016	388.557	388.162
CG13018	168.587	164.484
CG13021	1.69314	1.21897
CG13023	3.38553	1.53991
CG13024	9.44849	26.4891
CG13025	172.75	149.481
CG13028	7.74523	16.9975
CG13029	11.4435	11.773
CG13033	70.7118	406.404
CG13038	13.5732	40.3739
CG13041	7.62381	10.0371
CG13043	46.5809	17.6241
CG13044	251.256	420.429
CG13046	2.00906	16.6241
CG13047	22.2335	344.781
CG13049	4.64058	42.703
CG13051	22.0405	429.576
CG13055	5.76185	6.55824
CG13058	2.04485	4.36322
CG13059	40.2005	28.812
CG13060	2.32029	3.27112
CG13063	25.4361	15.7133
CG13066	7.57325	182.314
CG13067	593.463	1913.85
CG13068	6.09876	200.009
CG13069	26.2896	422.154
CG1307	1610.6	1397.65
CG13074	1.70794	3.17707
CG13075	1645.26	1515.81
CG13077	111.829	201.826
CG13078	1.67759	2.85613
CG13082	61.6179	100.525
CG13085	25.1887	19.156
CG13086	649.93	401.773
CG13088	154.097	177.291
CG1309	1134.55	1115.55
CG13096	4708.8	4407.95
CG13097	1587.44	1563.05
CG13101	70.2237	98.7215
CG13102	249.698	411.528
CG13108	9.46329	6.86318
CG13117	30.4751	34.8077
CG13123	54.3667	47.9981
CG13124	608.391	789.834
CG13126	946.896	1042.55
CG13135	4.56978	4.18752
CG13138	2.77938	1.25138
CG13144	3.80414	4.68417
CG13148	32.0998	26.1937
CG1315	216.216	570.425
CG13151	94.1993	100.756
CG13154	9.69436	9.35233
CG13155	3.15676	2.1814
CG13159	6.1797	2.3731
CG1316	1390.07	1425.1
CG13160	215.095	132.269
CG1317	1650.09	1600.78
CG13170	735.665	1598.33
CG13177	19.9622	11.1944
CG13185	5516.39	5688.64
CG13192	540.355	540.273
CG13197	373.759	333.227
CG13202	2.41679	3.14466
CG13203	1.67759	1.47508
CG13204	35.1149	34.5484
CG13215	3.18243	43.9284
CG13216	14.8734	108.907
CG13217	264.148	546.165
CG13218	88.8428	155.914
CG13220	3259.67	2623.7
CG13227	26.2508	90.083
CG13228	93.1699	159.86
CG13229	12.2691	13.6507
CG13230	77.9028	39.8197
CG13231	1.01465	1.5075
CG13247	6.34852	4.13672
CG13248	53.0238	47.0294
CG13252	684.083	641.121
CG13255	351.615	297.065
CG13258	1.43326	4.29839
CG13282	3.01358	3.031
CG13283	25.938	23.0462
CG13284	1211.89	803.198
CG13285	440.702	733.116
CG13287	3.0237	2.3731
CG13288	3.04394	2.48635
CG13293	52.0862	45.9129
CG13295	397.617	409.168
CG13299	1.02476	1.2838
CG13300	19.6984	19.517
CG13305	24.7802	12.2997
CG13310	2.7537	18.0051
CG13311	1563.85	2453.79
CG13312	237.8	608.626
CG13313	1.71338	4.92387
CG13314	2.06509	3.4812
CG13315	3897.03	2826.21
CG13318	1.336	5.10236
CG13319	606.568	516.099
CG13321	1618.86	2456.73
CG13323	2297.9	4186.9
CG13324	391.716	1320.71
CG13325	3.50846	9.97223
CG13330	4.05859	6.47741
CG13339	108.89	101.38
CG13344	185.156	150.8
CG13360	40233.5	16183.5
CG13362	2.01917	3.40037
CG13364	3705.05	3159.41
CG13365	436.587	340.65
CG13366	784.036	868.094
CG13367	304.174	329.653
CG13369	1233.06	1679.1
CG13373	126.006	156.248
CG13375	48.7979	41.0162
CG13376	8.94972	4.3464
CG13377	274.202	257.491
CG13384	710.97	844.687
CG13390	421.511	508.934
CG13392	442.21	437.014
CG13397	1586.52	1796.83
CG13398	292.426	308.106
CG13403	17.6893	12.3289
CG13404	11.8046	7.39463
CG13408	5.4047	5.42052
CG13409	22.1036	28.9322
CG13423	37.4415	43.2755
CG13436	4.42117	6.49818
CG13438	1.34612	5.77388
CG1344	884.054	817.893
CG13445	2560.72	8271.34
CG13449	4.3099	7.89005
CG13458	5.06311	6.17485
CG13460	17093.7	15555.9
CG13461	2088.64	1457.63
CG13465	1.71338	3.015
CG13482	12.4154	30.3557
CG13484	132.007	136.464
CG13488	16.8801	14.3882
CG13492	616.238	401.556
CG13501	3.14664	3.12784
CG13506	1119.37	1110.26
CG13516	232.666	333.55
CG13531	713.364	505.296
CG13532	22.2568	12.3129
CG1354	5883.47	4862.72
CG13540	78.9998	107.817
CG13545	60.1416	24.7721
CG13551	8699.41	7374.4
CG13559	59.1497	83.1138
CG13560	19521.5	31049.1
CG13562	23.189	45.9692
CG13563	2.36076	9.60961
CG13575	22.4381	29.1818
CG13577	296.053	267.165
CG13578	4.49744	1.5235
CG1358	361.49	508.243
CG13585	977.95	1136.37
CG13594	32.7153	35.919
CG13599	65.0399	86.2185
CG1360	208.674	189.293
CG13601	666.411	553.158
CG13603	281.519	300.49
CG13604	231.046	217.332
CG13605	668.098	685.946
CG13606	1.66747	26.9309
CG13607	1582.56	1571.71
CG13609	15.7783	20.0004
CG13615	3.74735	2.43793
CG13616	1.01465	4.31439
CG13617	1.38191	5.06954
CG13618	2.01917	19.8504
CG13623	206.831	298.101
CG13625	250.91	210.889
CG13630	1852.07	1857.54
CG13631	375.192	462.041
CG13639	3.37541	3.49802
CG13640	19.2838	24.2764
CG13641	2980.26	3493.89
CG13643	5.0024	3.22427
CG13650	31.0898	24.8887
CG13654	1574.82	900.62
CG13658	59.0758	62.7721
CG13659	112.361	261.892
CG13663	267.367	251.797
CG13667	662.329	569.126
CG13671	395.958	379.36
CG13674	2.39656	265.392
CG13675	1.336	1.79603
CG13676	77.3471	169.805
CG13678	184.698	613.035
CG13679	14.1762	255.111
CG1368	710.246	1278.43
CG13685	3.0595	3.97703
CG13689	56.8901	57.4608
CG13690	182.384	232.891
CG13692	4.19164	19.2016
CG13693	12.224	12.0776
CG13694	472.074	557.666
CG13698	110.4	112.562
CG13699	20.8788	57.4958
CG13704	213.595	260.354
CG13705	534.295	1624.32
CG13707	26.8134	19.6335
CG1371	5959.81	5717.44
CG13722	93.4397	109.874
CG13731	1401.34	2791.4
CG13733	4.49819	3.94741
CG13737	6.85352	16.2327
CG13738	5.86923	1.55592
CG13739	17.9687	7.10289
CG13741	101.815	127.185
CG13742	176.426	159.223
CG13743	64.3701	52.8177
CG13748	12.5235	29.4288
CG13749	2.80505	1.55592
CG13751	430.93	425.767
CG13759	8.13273	5.00232
CG13760	103.37	97.7042
CG13766	163.436	144.948
CG13771	3.44232	3.59207
CG13773	693.047	657.048
CG13775	74.935	130.493
CG13784	830.24	594.244
CG13793	32.6678	26.6667
CG13794	102.747	105.962
CG13795	2293	1845.67
CG13806	34.8116	261.635
CG13807	398.355	408.269
CG13810	9.59558	64.5135
CG13813	55.6755	83.4803
CG13827	111.376	149.908
CG13847	11.4894	29.793
CG13850	3120.88	2924.05
CG13856	1.37179	2.19741
CG13862	7.07761	9.78094
CG13865	1371.75	1247.89
CG13868	8105.36	7618.89
CG13869	4.70129	5.37448
CG13875	13.9008	11.4041
CG13876	172.797	153.131
CG13877	485.374	471.388
CG13887	2041.99	3204.42
CG13890	1946.99	1855.19
CG13893	165.773	215.213
CG13894	31.6252	26.1229
CG13895	256.905	252.51
CG13896	56.4435	90.1971
CG13901	323.142	315.194
CG13902	178.031	213.376
CG13905	773.829	694.22
CG13907	295.403	312.82
CG13912	3978.77	2814.66
CG13917	2021.74	1774.58
CG13919	75.917	67.6779
CG13920	72.4156	58.2622
CG13921	82.9931	79.0401
CG13926	489.92	379.334
CG13928	284.873	224.948
CG13933	385.529	423.057
CG13937	57.5157	82.3208
CG13946	131.015	221.603
CG13947	2504.38	2810.22
CG13949	17.298	10.4752
CG13950	19.1491	38.5217
CG13954	32.6421	33.3301
CG13962	3367.44	5518.38
CG13982	55.912	59.7375
CG13992	8.05801	5.02071
CG13994	381.906	328.063
CG13995	47.1857	30.9151
CG13999	3.69676	3.81577
CG14005	131.98	131.443
CG14015	14.5062	7.47185
CG1402	26.0345	22.7001
CG14022	1.01465	1.62034
CG14024	37.9473	22.9627
CG14036	32.8678	28.1518
CG14043	801.925	631.835
CG14044	4.13561	6.67387
CG14050	8.73107	11.2295
CG14053	6.92511	9.22424
CG14057	255.591	223.495
CG1407	768.012	778.595
CG14072	154.535	197.69
CG14073	744.754	698.96
CG14074	61.3805	51.5713
CG14075	86.7586	35.3044
CG14079	7.35384	5.00471
CG14082	8.42841	11.2884
CG14086	3.03382	2.11657
CG14095	7.99107	38.1513
CG14100	568.982	726.046
CG14102	37.3854	85.6442
CG14104	50.7664	51.1896
CG14105	2.39656	5.80309
CG14107	2.42223	50.6711
CG14109	19.5296	19.9524
CG14117	91.7638	86.509
CG14118	121.728	128.74
CG14120	50.2446	120.21
CG14130	320.321	345.05
CG14131	362.519	452.221
CG14132	60.53	88.6122
CG14135	57.8051	56.9114
CG14141	17.4591	15.2198
CG14142	1.69314	3.07983
CG14143	883.895	7883.14
CG14160	30.5569	62.4461
CG14174	186.18	159.755
CG1418	1008.53	872.278
CG14182	84.9695	75.9706
CG14183	22.9322	35.3715
CG14184	282.388	319.914
CG14186	57.1671	41.0022
CG14191	7.32269	19.8808
CG14194	466.178	486.92
CG14195	403.362	349.032
CG14196	2173	3165.06
CG14200	1306.19	1227.81
CG14204	1.05044	1.2838
CG14205	38.5746	191.987
CG14207	4217.97	3508.73
CG14210	1094.19	1121.9
CG14212	4.86002	6.19085
CG14215	947.851	878.317
CG14218	1.34612	10.9859
CG14219	5.76653	21.2078
CG14220	277.865	262.178
CG14221	38.4872	58.0835
CG14223	17.1914	26.8028
CG14227	1.75929	1.26738
CG14229	99.218	142.539
CG14230	1121.22	1156.09
CG14231	477.634	509.662
CG14232	275.47	287.676
CG14234	62.9765	56.3153
CG14238	12.6939	7.05686
CG14245	306.598	361.33
CG14247	1.4177	10.2672
CG14252	176.427	162.102
CG14253	70.4773	68.0886
CG14257	10.5565	27.656
CG14265	11678.7	14568.7
CG14270	1297.01	1031.03
CG14273	43.3716	2489.09
CG14274	13.0892	19.5259
CG14275	395.813	1354.92
CG14285	34.9663	97.6214
CG14286	524.138	521.604
CG14291	560.532	456.923
CG14292	5044.57	4916.59
CG14298	5.16581	4.50847
CG14300	279.419	1958.86
CG14301	5.09423	7.12169
CG14302	2309.62	4692.36
CG14304	5.48717	6.6719
CG14312	8.45952	7.55309
CG14314	147.302	146.891
CG14321	20.6111	13.6155
CG14322	515.544	453.911
CG14324	22.9936	145.054
CG14326	11.9687	92.6286
CG1434	585.077	585.988
CG14341	146.365	169.759
CG14346	125.871	155.795
CG14352	72.8303	59.4818
CG14353	277.01	304.261
CG14356	14.272	27.8517
CG14357	85.6503	90.7846
CG14367	4.87014	3.43238
CG14369	4.6507	22.5413
CG14372	94.811	90.2489
CG14374	35.7482	21.1476
CG14377	43.6576	37.754
CG14395	3.06418	2.01974
CG14397	4.10526	5.67861
CG1440	1904.9	2394.1
CG14401	51.0505	59.1549
CG14407	1182.19	1055.99
CG14408	399.832	323.019
CG1441	10.316	37.8363
CG14411	703.623	683.35
CG14414	181.639	149.747
CG14416	8.36924	11.1311
CG14417	3.40576	3.46479
CG14418	39.1775	7.92485
CG14419	182.773	246.047
CG14420	10.0088	9.77162
CG14421	2.04485	8.4159
CG14422	286.644	24.0971
CG14423	222.395	153.5
CG14424	36.8992	5.96715
CG14431	28.1019	39.9048
CG14434	363.951	475.14
CG14435	441.043	513.793
CG14438	829.432	962.203
CG14439	20.2547	88.9929
CG14440	329.737	306.506
CG14441	452.139	476.797
CG14442	1469.41	1374.39
CG14445	14.9566	18.9328
CG14450	179.399	162.235
CG14451	4.8499	10.6833
CG14456	15.0198	1.76362
CG14457	9.18785	12.4157
CG14459	1.39203	1.76362
CG14464	318.032	439.872
CG14478	1110.77	1129.83
CG14480	814.438	806.94
CG14483	1105.12	1094.41
CG14490	7.47055	4.36281
CG14495	1.02476	8.60079
CG14499	2.43235	16.8402
CG14500	7.15312	9.09301
CG14502	14.3303	36.7798
CG14507	2.08064	2.75847
CG14511	138.481	201.542
CG14512	124.597	114.146
CG14516	520.123	715.327
CG14523	1597.91	1415.34
CG14526	3301.32	2101.06
CG14527	2184.02	2089.41
CG14528	3170.82	2208.81
CG14529	982.497	1548.05
CG14535	40.2559	25.3001
CG14543	797.145	678.173
CG14544	385.161	300.659
CG14545	69.7388	106.382
CG14556	15.5153	8.77247
CG14561	84.1641	94.7816
CG14562	402.282	408.78
CG14563	1.34612	1.15414
CG14564	4.45696	359.107
CG14565	47.8913	362.632
CG14566	537.07	543.381
CG14567	167.544	89.8857
CG14568	17.6854	343.656
CG14569	163.443	1075.32
CG14570	2.38644	39.9793
CG14572	38.9657	128.643
CG14573	3.41664	188.108
CG14591	34.8177	21.8737
CG14598	35.511	63.8492
CG14606	421.795	296.802
CG1461	1.39747	2.62922
CG14610	3.05406	2.1654
CG14613	1107.19	1079.84
CG14615	502.513	710.232
CG14618	564.928	642.535
CG14621	1797.28	1528.84
CG14626	2.37632	15.9502
CG14628	17.6707	16.9214
CG14629	22214	12850.2
CG1463	456.806	500.691
CG14636	113.616	105.841
CG14641	1333.46	1146.75
CG14642	134.087	169.494
CG14644	25.1716	5.19838
CG14646	519.53	517.713
CG14647	241.411	304.309
CG14650	1068.67	1072.7
CG14655	10.1013	15.67
CG14657	480.191	512.6
CG14661	2.72259	48.1054
CG14662	8.80579	5.4229
CG14667	204.894	235.721
CG14669	224.4	254.565
CG14671	437.772	485.979
CG1468	10326.3	6651.88
CG14683	1723.3	1621.46
CG14684	1.39203	1.21897
CG14687	29.4722	48.482
CG14688	1257.08	851.048
CG14691	5.21173	5.58218
CG14692	20.1676	3.75333
CG14694	20.8975	35.4847
CG14695	8.00122	94.6208
CG14696	413.163	476.256
CG14701	458.866	539.311
CG14710	162.163	152.023
CG14711	211.945	248.865
CG14712	839.645	880.86
CG14715	4752.65	4157.3
CG14717	3.77847	3.80175
CG14718	3.71232	4.84543
CG14720	1.01465	7.97449
CG14721	897.978	1028.16
CG14722	1357.39	1482.91
CG14749	336.705	414.205
CG14757	25.433	20.1133
CG14763	3.10073	4.74859
CG14764	628.865	587.85
CG14767	2291.72	2144.82
CG14777	765.504	718.81
CG14780	31.3116	231.376
CG14785	115.455	136.148
CG14787	334.214	352.244
CG14795	17.5096	65.0746
CG14797	2.72803	4.89146
CG14798	6.2007	14.4023
CG14803	371.087	416.273
CG14805	1632.55	1379.09
CG14806	703.501	584.973
CG14810	7.86349	7.42664
CG14811	16.5689	14.5499
CG14812	403.501	443.45
CG14814	98.405	125.537
CG14817	1159.03	1042.79
CG14818	525.44	574.603
CG14820	14.0051	11.3725
CG14823	193.19	236.348
CG14826	6.39443	16.0862
CG14829	2.40199	5.21241
CG14830	77.4429	135.817
CG14834	15.9978	10.9407
CG14850	2651.12	4346.53
CG14851	4880.74	10304
CG14852	1745.18	720.499
CG14853	21.9557	22.2395
CG14854	3.14664	18.9427
CG14855	63.497	132.276
CG14856	218.983	278.074
CG14857	278.345	316.289
CG1486	1666.36	1408.01
CG14860	53.1739	52.1028
CG14864	6.16022	4.66735
CG14866	2.47358	12.7763
CG14868	36.1335	90.9951
CG14877	3.69676	3.59207
CG14879	546.916	294.186
CG14880	31.5263	60.5067
CG14881	289.518	323.29
CG14882	844.915	763.915
CG14883	295.589	300.057
CG14894	1225.61	1047.78
CG14903	283.472	300.695
CG14905	9.37301	6.89478
CG14906	95.2699	158.044
CG14907	192.835	476.663
CG1492	26.643	37.6918
CG14921	8.03157	6.12841
CG14931	53.2042	59.377
CG14932	129.42	148.792
CG14933	6.96558	5.88672
CG14937	31.8422	18.0779
CG1494	6.30884	3.72091
CG14945	478.589	389.644
CG14949	75.8462	195.792
CG14957	357.199	570.079
CG14958	151.836	131.448
CG14961	32.9923	25.5122
CG14963	507.913	424.307
CG14964	60.5075	63.3421
CG14965	58.9638	78.5795
CG14966	360.263	397.521
CG14967	840.367	785.071
CG14968	202.263	255.839
CG14969	458.262	425.723
CG14971	768.948	828.314
CG14977	360.637	377.543
CG14982	19.3553	25.018
CG14984	68.0403	61.6628
CG14985	204.661	244.665
CG14989	403.627	427.942
CG14990	2195.29	1479.27
CG14995	147.034	199.847
CG14997	1578.34	1664.17
CG15011	559.665	445.998
CG15012	885.82	784.908
CG15014	652.548	623.312
CG15019	2197.41	2116.95
CG15020	2.65176	1.15414
CG15021	34.7017	62.6394
CG15023	12.045	117.559
CG15024	2.04485	9.29791
CG15027	559.508	646.12
CG1503	23.6372	40.6968
CG1504	2.66188	6.50941
CG15043	391.429	728.838
CG15044	32.8656	75.5602
CG15046	95.3688	233.941
CG15047	11.5307	12.0776
CG15056	66.0327	75.3792
CG15065	180.455	148.827
CG15067	32.4056	47.514
CG15068	50.6551	63.8207
CG15073	91.2285	100.832
CG15080	5.18137	20.7468
CG15082	8.71472	4.63575
CG15083	240.562	302.728
CG15084	90.7725	91.2416
CG15093	10319.5	10541.4
CG15096	842.316	906.696
CG15097	79.6457	87.3794
CG15098	1876.43	3609.32
CG15099	1520.04	1544.14
CG15107	180.053	180.058
CG15111	996.362	1044.17
CG15117	381.641	572.595
CG15118	757.376	772.236
CG15120	10.6577	23.8834
CG15126	12.936	18.543
CG15127	1.69782	3.8966
CG1513	1300.97	1351.52
CG15141	204.476	198.93
CG15142	4.44141	7.84361
CG15152	142.372	226.018
CG15153	32.1093	185.47
CG15155	323.254	564.198
CG15160	524.056	536.013
CG15168	814.903	696.388
CG15170	2.37088	9.25549
CG15172	65.7706	74.5411
CG15185	47.9077	43.3756
CG15186	22.9874	28.1642
CG15199	1234.48	998.781
CG15201	104.444	80.3341
CG15202	78.6326	92.4805
CG15203	895.858	984.444
CG15209	193.323	230.791
CG15210	91.2144	86.8953
CG15211	267.747	289.267
CG15212	8.12805	148.354
CG15213	184.033	375.196
CG15221	403.202	552.068
CG15225	14.0051	19.7656
CG1523	434.631	472.105
CG15236	59.3264	47.1247
CG15237	165.098	177.172
CG15239	38.8809	42.3971
CG15247	19.7226	33.5399
CG15253	10.5791	4.71379
CG15254	19.5219	3.78574
CG15255	11.2421	105.34
CG15262	332.655	361.577
CG15270	44.5751	30.6718
CG15279	405.001	375.616
CG15282	221.385	514.291
CG1529	347.7	321.208
CG15293	6072.66	3724.66
CG15308	107.933	78.2759
CG15309	83.6397	86.4115
CG15312	29.8565	29.3956
CG15317	202.31	166.384
CG1532	1362.76	1573.29
CG15332	12.5298	11.1956
CG15337	7.42074	36.8718
CG15343	506.27	462.605
CG15347	324.851	855.431
CG15353	17.8201	55.9042
CG15356	527.248	452.953
CG15362	261.23	209.465
CG15365	44.7883	51.0075
CG15369	2527.26	1537.36
CG1537	23.929	16.5629
CG15375	4.09514	7.49065
CG15382	40.3749	28.6804
CG15385	396.464	406.715
CG15387	128.855	122.018
CG15390	242.152	244.531
CG15394	13.181	18.605
CG15398	84.3322	74.7441
CG15399	12.5764	41.6576
CG15406	1661.79	1791.87
CG15408	481.856	512.261
CG15412	3.76835	6.92999
CG15414	12.2318	56.9088
CG15418	2.74826	4.33121
CG1542	2223.84	2281.36
CG15422	44.3372	74.8847
CG15423	22.7058	106.934
CG15431	45.7376	40.8921
CG15432	218.731	183.014
CG15435	73.1571	75.8862
CG15436	118.77	111.791
CG15439	426.791	420.101
CG1544	1787.97	2543.66
CG15440	413.344	421.394
CG15443	332.32	454.512
CG15445	589.92	676.676
CG15446	63.2627	61.8873
CG15449	4.56434	4.3148
CG1545	9.1069	11.8007
CG15456	34.9111	38.9303
CG15473	1.35623	2.35669
CG15478	8.44396	6.73673
CG15482	15.8958	9.07939
CG15484	33.2856	40.79
CG15497	21.2119	52.4979
CG1550	908.823	928.955
CG15506	1.78497	1.28339
CG15514	468.958	403.709
CG15515	189.467	270.345
CG1552	36.0821	30.3641
CG15522	1.01465	2.08457
CG15525	203.346	183.782
CG15526	6.37966	5.24441
CG15528	2.80505	6.56063
CG15529	20.0003	20.2109
CG15530	15.8741	16.636
CG15531	57.4386	68.9758
CG15533	345.373	524.978
CG15534	47.4714	216.324
CG15535	257.713	284.817
CG15536	169.123	225.552
CG15537	31.8897	29.4108
CG15539	12.122	5.30924
CG15544	4.77756	10.3448
CG15546	4.40093	8.11375
CG15547	27.2934	21.1241
CG15550	5.43506	8.76042
CG15554	25.3949	25.0764
CG15556	149.48	125.317
CG15561	406.753	446.699
CG15570	1.77485	1.81204
CG15579	1.72894	4.47606
CG15597	8.37781	40.7189
CG15599	1377.75	1642.6
CG15601	56.645	51.7162
CG15602	143.663	159.415
CG1561	8.98083	15.6568
CG15611	200.281	279.326
CG15615	9.42282	189.287
CG15628	44.9229	37.8908
CG15629	33.9268	64.7791
CG15630	32.0975	27.4655
CG15642	28.2365	48.5864
CG15643	64.5014	74.9952
CG15646	4.04379	8.83648
CG15649	1.0302	9.31392
CG15651	18.9375	18.3073
CG15653	157.968	175.458
CG15661	447.365	3161.04
CG15673	98.6904	164.365
CG15674	118.195	142.815
CG15695	53.156	112.977
CG15701	1.38191	8.17858
CG15706	940.507	590.047
CG1571	15.6717	6.43335
CG15710	4.13093	1.60434
CG15715	1625.08	1879.42
CG15717	412.461	324.845
CG1572	426.83	507.501
CG15725	2.70235	9.97659
CG15728	32.6686	22.4267
CG15731	2.02929	7.79041
CG15739	191.149	364.704
CG15740	2.02929	33.2786
CG15741	8967.38	5566.35
CG15743	328.475	329.436
CG15744	269.309	283.447
CG15747	299.522	226.934
CG1575	688.297	762.705
CG15760	32.2827	19.7235
CG15765	146.451	105.541
CG15766	86.9856	261.251
CG15771	1057.51	1025.47
CG15772	5.1199	3.33595
CG15773	3.43144	8.30906
CG1578	2127.78	2152.58
CG15784	1001.1	13167.4
CG15803	23.0217	18.038
CG15812	317.209	271.833
CG15814	1341.13	1251.79
CG15818	299.857	432.313
CG1582	1512.26	3044.83
CG15820	635.316	718.009
CG15822	172.321	212.22
CG15829	280.481	340.976
CG15861	124.988	101.437
CG15863	158.092	145.09
CG15864	40.9452	47.3178
CG15865	6.54153	25.9132
CG15870	5.07323	7.50788
CG15877	338.536	314.279
CG15879	175.975	147.718
CG15881	1139.91	964.303
CG15882	30.6152	30.8486
CG15887	5.053	2.98258
CG15890	108.684	173.563
CG15891	179.29	196.463
CG15892	1.39747	3.88217
CG15894	60.2608	43.1924
CG15905	8.28675	33.1002
CG15908	559.912	525.157
CG15909	9.08277	12.9112
CG15912	92.7723	68.8401
CG15914	146.827	147.692
CG15916	268.311	267.92
CG15919	2.03941	2.5968
CG15922	257.073	225.843
CG15923	9.05166	13.1857
CG15930	537.796	579.179
CG1598	1523.93	1449.34
CG1603	209.916	198.886
CG1607	5215.81	3835.21
CG1620	1004.22	1016.76
CG1622	724.737	742.212
CG1628	1472.58	1560.92
CG1632	68.2076	79.6179
CG1635	802.488	741.791
CG1636	1002.63	895.743
CG1637	1423.63	1077.02
CG1638	15.187	10.8262
CG1640	7604.45	8695.17
CG1646	1738.09	1646.72
CG1647	236.551	241.1
CG1648	697.026	658.356
CG1657	542.137	576.154
CG1662	2198.88	2304.77
CG1663	73.3361	79.681
CG1665	259.238	691.391
CG1667	409.264	438.229
CG16700	80.5903	87.8285
CG16704	1140.72	720.149
CG1671	1542.13	1459.98
CG16710	38.411	35.6744
CG16711	310.29	327.024
CG16713	4231.87	2569.88
CG16717	312.514	379.525
CG16719	1.02476	3.80215
CG16721	260.512	274.51
CG16727	857.312	1188.99
CG1673	2320.49	2418.08
CG16732	16.2351	32.1924
CG16734	247.802	237.16
CG16736	3.76367	4.47606
CG1674	316.998	313.209
CG16743	6700.15	4815.56
CG16749	29.8838	26.7644
CG16753	394.981	428.058
CG16756	906.8	805.947
CG16758	4225.54	2968.41
CG16762	2744.63	1901.89
CG1677	3022.57	2678.88
CG16771	408.444	429.136
CG16772	2.76926	65.001
CG16779	72.3184	77.3314
CG16786	32.7106	43.3099
CG16787	802.816	1078.12
CG16789	22.3455	21.7016
CG16790	110.02	165.367
CG16791	586.655	615.573
CG16798	3.78858	2.11657
CG16799	791.929	551.146
CG16812	498.594	512.139
CG16817	12784.1	10824.4
CG16820	30.2821	70.782
CG16824	5.03898	4.09028
CG16833	1537.38	1717.97
CG16836	16.5852	29.4493
CG16854	8.74976	6.76594
CG16863	40.5873	44.8507
CG16865	175.62	201.143
CG16868	308.33	305.829
CG1688	14.889	7.18413
CG16884	799.046	1459.74
CG16885	758.262	1235.21
CG16886	1.37179	5.54697
CG16890	164.772	174.843
CG16892	477.687	553.77
CG16896	267.706	368.044
CG16898	7.79269	137.508
CG16903	1191.83	1098.5
CG16904	6.98733	5.32484
CG16908	276.129	272.557
CG16926	7869.27	7439.11
CG16935	3142.69	2683.78
CG1695	48.2509	47.893
CG16952	775.861	782.734
CG16953	513.234	574.976
CG16957	7.59348	1.84445
CG16959	23.9609	34.4527
CG16972	575.439	532.899
CG16974	4225.63	4157.31
CG16979	766.842	793.142
CG1698	60.5651	88.5997
CG16985	610.589	743.624
CG16986	348.752	394.453
CG16989	1204.63	1360.63
CG16995	2.73271	14.2554
CG17002	346.43	321.47
CG17010	2.49926	2.01974
CG17018	37.3621	51.9824
CG17019	1533.98	1427.09
CG17026	340.116	368.952
CG17027	1059.09	1487.53
CG17028	62.9149	303.396
CG17029	2317.33	2898.18
CG1703	5102.65	5416.09
CG17032	1406.73	2053.71
CG17036	2387.42	2421.71
CG17047	79.4623	92.1472
CG17059	367.721	384.151
CG17065	325.772	340.19
CG17068	321.363	284.663
CG17075	54.685	46.1825
CG17078	494.469	452.514
CG17083	4.54879	4.71577
CG17098	14.6205	6.12881
CG17104	129.268	172.914
CG17107	6.41935	7.29738
CG17108	13.4277	30.8708
CG17109	238.771	468.797
CG17110	7.88296	11.7882
CG17111	5.28331	1.95729
CG17118	1.39203	1.58793
CG17119	127.042	112.693
CG17121	124.465	126.332
CG17122	1.35623	2.71005
CG17124	227.073	225.195
CG17127	1.69314	6.05921
CG17129	76.4632	95.7113
CG17134	13076.1	10991.1
CG17141	354.492	298.443
CG17145	316.885	586.047
CG17147	30.7429	235.233
CG17162	22.0203	23.0826
CG17163	134.761	146.744
CG17167	71.5093	194.41
CG17168	578.25	481.153
CG1718	567.342	659.367
CG17180	99.3029	89.7669
CG17186	81.6431	79.9392
CG17187	176.965	293.813
CG17190	4.80867	11.6282
CG17191	6.49018	98.4665
CG17193	62.2677	35.7586
CG17202	632.4	700.063
CG17207	7.57869	3.73773
CG17209	863.398	926.186
CG17211	11.9423	13.2048
CG17219	589.11	600.082
CG1722	10.1075	3.99303
CG17221	1020.5	607.484
CG17224	13.8191	9.94261
CG17230	36.1234	45.6362
CG17233	926.822	836.238
CG17249	198.929	175.283
CG17258	18.7452	15.0801
CG17260	271.292	197.324
CG17261	259.726	132.401
CG17264	9.32166	5.80589
CG17265	68.3694	76.0556
CG17266	432.938	489.831
CG17267	7.46435	3.60807
CG17270	37.9021	101.073
CG17271	3675.7	2728.32
CG17272	271.531	402.451
CG17278	2190.87	2089.44
CG17283	322.014	121.836
CG17290	18.476	152.154
CG17292	1347.65	1368.04
CG17294	248.908	695.768
CG17321	36.5685	38.1965
CG17322	327.242	230.344
CG17323	2268.77	2234.12
[truncated: 8,476 more rows]
