# Supplementary material for: Fat body-specific reduction of CTPS alleviates HFD-induced obesity
Source: eLife. 2023 Sep 11;12:e85293. doi: 10.7554/eLife.85293 (PMC10495109; doi:10.7554/eLife.85293)
Supplement: Figure 5—figure supplement 1—source data 2. — Gene functions are predicted on the basis of the KEGG database. [file elife-85293-fig5-figsupp1-data2.xls]

Classification_level2	Classification_level1	gene_number	percentage	Genes
Cell growth and death	Cellular Processes	1	1.39	Fadd
Transport and catabolism	Cellular Processes	8	11.11	AOX1; CG12428; CG31683; Ect3; Gba1b; Hsp70Bb; LManV; Lip3
Signal transduction	Environmental Information Processing	3	4.17	CG17028; Gcn5; edl
Folding, sorting and degradation	Genetic Information Processing	3	4.17	CG12264; CG32581; Hsp70Bb
Replication and repair	Genetic Information Processing	6	8.33	Irbp; Ku80; RpA-70; Xpc; mre11; rad50
Transcription	Genetic Information Processing	1	1.39	Hsp70Bb
Translation	Genetic Information Processing	1	1.39	Bin1
Amino acid metabolism	Metabolism	5	6.94	Gclc; Gnmt; aay; yellow-f; yip2
Biosynthesis of other secondary metabolites	Metabolism	1	1.39	AOX1
Carbohydrate metabolism	Metabolism	20	27.78	ACC; AGBE; ATPCL; AcCoAS; CG10638; CG12766; CG15661; CG17028; CG32444; CS-2; Ect3; Hex-C; Pgd; Pgi; PyK; Sodh-1; Taldo; Ugt36Ba; Ugt86Di; Zw
Energy metabolism	Metabolism	1	1.39	CG30022
Glycan biosynthesis and metabolism	Metabolism	3	4.17	Ect3; Gba1b; LManV
Lipid metabolism	Metabolism	14	19.44	ACC; CG10638; CG11162; CG12766; CG31683; Ect3; FASN1; FASN2; Gba1b; Lip3; bgm; hll; sPLA2; yip2
Metabolism of cofactors and vitamins	Metabolism	11	15.28	CG10581; CG10638; CG12264; CG12766; CG15661; CG32549; Mocs1; Ppat-Dpck; Ugt36Ba; Ugt86Di; mal
Metabolism of other amino acids	Metabolism	11	15.28	Gclc; GstD10; GstD3; GstD4; GstD5; GstD6; GstE1; GstE11; GstE6; Pgd; Zw
Metabolism of terpenoids and polyketides	Metabolism	4	5.56	Jhe; phm; sad; spok
Nucleotide metabolism	Metabolism	6	8.33	AOX1; CG10581; CG31793; CG32549; CTPsyn; PyK
Xenobiotics biodegradation and metabolism	Metabolism	12	16.67	AOX1; CG15661; GstD10; GstD3; GstD4; GstD5; GstD6; GstE1; GstE11; GstE6; Ugt36Ba; Ugt86Di
Aging	Organismal Systems	1	1.39	Hsp70Bb
Environmental adaptation	Organismal Systems	1	1.39	tim
Immune system	Organismal Systems	1	1.39	Fadd
Sensory system	Organismal Systems	1	1.39	CG30054
