# Supplementary material for: Fat body-specific reduction of CTPS alleviates HFD-induced obesity
Source: eLife. 2023 Sep 11;12:e85293. doi: 10.7554/eLife.85293 (PMC10495109; doi:10.7554/eLife.85293)
Supplement: Figure 5—source data 1. — Differentially expressed genes were identified on the basis of fold change values (gene expression level in the CgG4>CTPS-Ri relative to that in the CgG4>+ control line, ≥2.0-fold change, Student’s t-test, P<0.05). [file elife-85293-fig5-data1.xls]

gene	Contr1	Contr2	Contr3	CTPs_Ri1	CTPs_Ri2	CTPs_Ri3
ACC	565.639	531.792	446.211	385.765	237.44	227.511
ATPCL	702.943	718.361	638.874	526.337	241.904	147.061
CG11162	2.0958	1.87892	3.34789	19.3969	24.6974	15.6983
CG31683	0.197492	0.522835	1.46506	0	0.0719137	0
CG32549	8.30938	11.4253	9.45098	27.4084	27.1525	36.2953
CG3292	37.7392	66.8876	52.5734	21.6876	16.4251	4.41507
CG8100	0.20749	0.0896724	0.0702995	1.15462	1.78777	1.50482
CTPsyn	54.6663	54.3354	51.8288	33.4449	21.9029	22.5342
FASN1	1963.68	1736.42	1615.63	1322.97	742.528	611.271
FASN2	8.89282	8.91681	7.95439	6.80777	3.72588	3.12733
Gcn5	6.66997	5.89199	7.46637	19.0487	18.1086	20.9845
Hex-C	105.195	119.206	56.1507	49.6529	34.8148	39.7839
Lsp1gamma	1.52699	0.512097	0.684344	0.142366	0.281468	0.0478602
Mtp	329.237	337.138	440.513	277.981	141.84	146.073
Sodh-1	226.284	406.825	193.068	175.928	112.279	134.697
bgm	209.183	220.953	171.438	163.303	92.0831	80.2572
fa2h	1.89401	0.837669	3.34029	4.54815	5.94919	4.32629
hll	34.0533	31.1843	46.486	85.2759	92.1212	89.3231
kat-60L1	1.64822	1.20881	1.15692	0.181854	0.263589	0.501411
sPLA2	16.2195	14.1186	7.39588	5.17123	6.13788	5.39042
yip2	48.4359	41.7733	42.1873	120.688	124.1	176.131
